1 **Honokiol inhibits SARS-CoV-2 replication in cell culture**

2

3 Clarisse Salgado-Benvindo<sup>1</sup>, Anouk A. Leijs<sup>1</sup>, Melissa Thaler<sup>1</sup>, Ali Tas<sup>1</sup>, Jack L. Arbiser<sup>2,3</sup>, Eric J. Snijder<sup>1</sup>,  
4 Martijn J. van Hemert<sup>1</sup>

5

6 1. Department of Medical Microbiology, Leiden University Medical Center, Leiden, The  
7 Netherlands

8 2. Department of Dermatology, Emory University School of Medicine, Atlanta, GA, USA

9 3. Division of Dermatology, Veterans Affairs Medical Center, Decatur, GA, USA

10

11 **SUMMARY**

12 SARS-CoV-2 emerged in 2019 and since its global spread has caused the death of over 6 million  
13 people. There are currently few antiviral options for treatment of COVID-19. Repurposing of known  
14 drugs can be a fast route to obtain molecules that inhibit viral infection and/or modulate pathogenic  
15 host responses. Honokiol is a small molecule from *Magnolia* trees, for which several biological  
16 effects have been reported, including anticancer and anti-inflammatory activity. Honokiol has also  
17 been shown to inhibit several viruses in cell culture. In this study, we show that honokiol protected  
18 Vero E6 cells from SARS-CoV-2-mediated cytopathic effect with an EC50 of 7.8  $\mu$ M. In viral load  
19 reduction assays we observed that honokiol decreased viral RNA copies as well as viral infectious  
20 progeny titers. The compound also inhibited SARS-CoV-2 replication in the more relevant A549 cells,  
21 expressing ACE2 and TMPRSS2. A time-of-addition assay showed that honokiol inhibited virus  
22 replication even when added post infection, suggesting it acts at a post-entry step of the replication  
23 cycle. Honokiol was also effective against more recent variants of SARS-CoV-2, including omicron  
24 and it inhibited other human coronaviruses as well. Our study suggests that honokiol is an  
25 interesting molecule to evaluate in animal studies and clinical trials to investigate its effect on virus  
26 replication and pathogenic (inflammatory) host responses.

27

## 28 INTRODUCTION

29 Since it emerged in 2019, the Severe Acute Respiratory Syndrome Coronavirus 2 (SARS-CoV-2) lead  
30 to a pandemic with a major impact in the whole world. By June 2022 the virus has infected over 500  
31 million people and caused over 6 million deaths globally. SARS-CoV-2 is a member of the  
32 betacoronavirus genus within the coronaviridae family, and it is genetically close to SARS-CoV, with  
33 almost 80% identity [1]. COVID-19, the disease caused by SARS-CoV-2, often involves mild symptoms  
34 like fever, cough, tiredness and loss of taste and/or smell, but it can lead to more serious outcomes,  
35 with patients developing shortness of breath, severe pneumonia, respiratory failure or death [2].  
36 Since it emerged in 2019, SARS-CoV-2 had given rise to innumerable variants of interest and/or  
37 concern, some of which displayed a worryingly fast spread, increased vaccine escape and/or changes  
38 in disease severity [3-5]. Risk factors for severe disease include old age, obesity, and defects in  
39 interferon signaling. Host factors are involved in pathogenesis, e.g. via the inflammatory response,  
40 but also play a role in viral replication, and therefore constitute interesting therapeutic targets.  
41 Even with the advances in vaccine development, antivirals are still of major importance in order to  
42 treat patients that, for a variety of reasons, could not be vaccinated or that did not properly respond  
43 to vaccination. Moreover, waning immunity and the continuing emergence of new variants that, to  
44 varying degrees, can escape natural or vaccine induced immunity in the population, or the (zoonotic)  
45 emergence of yet a new coronavirus makes it even more important to increase our preparedness. By  
46 developing antivirals. Preferably not only active against SARS-CoV-2 but to a broad-spectrum of  
47 coronaviruses. Compared to vaccines, antivirals also have advantages in terms of storage,  
48 distribution, administration and acceptance by part of society. Currently, there are very few options  
49 available for treating COVID-19 patients, such as remdesivir, paxlovid and molnupiravir. Issues with  
50 costs, route of administration, concerns about side-effects and possible development of resistance  
51 regarding the currently approved antivirals against SARS-CoV-2 make it necessary to continue  
52 research on potential new antivirals. Repurposing of compounds with already known  
53 pharmacokinetic and safety profiles is one way to do this. Early in the pandemic, as part of our drug  
54 repurposing efforts, we identified the small molecule Honokiol (HK) as an inhibitor of SARS-CoV-2  
55 replication in cell culture. HK is a polyphenolic lignan compound, extracted from the barks of plants  
56 of the Magnolia genus. It has been used in Traditional Chinese Medicine for its analgesic and other  
57 effects [6]. In Western medicine HK has also been studied in pharmaceutical and biological studies  
58 into its anticancer activities [7-9], anti-inflammatory [10, 11], anti-thrombotic [12], anti-oxidative  
59 [13, 14] and antiviral activities [15-17]. HK has been found to modulate several molecular targets,  
60 including NF- $\kappa$ B, STAT3, m-TOR and SIRT3 [8, 18-20]. In this study, we focused on the efficacy of  
61 honokiol in inhibiting SARS-CoV-2 replication in cell culture. Future studies will assess the effect on

62 the host response to virus, which could play a role in mediating the severity of disease. We found  
63 that honokiol decreased replication of the early pandemic more recent variants of SARS-CoV-2, as  
64 well as other pathogenic coronaviruses. Honokiol and analogs may be useful in the treatment of  
65 SARS-CoV-2 infections and our studies provide a rationale for *in vivo* studies to assess its effect on  
66 the infection and pathogenesis linked to the host response to SARS-CoV-2 infection.

67

68

## 69 MATERIAL AND METHODS

### 70 1. Cell culture and compounds and viruses

71 Vero E6 cells were maintained in Dulbecco's modified Eagle's medium (DMEM; Lonza),  
72 supplemented with 8% fetal calf serum (FCS; Bodinco), 2 mM L-glutamine, 100 IU/ml of penicillin,  
73 and 100 µg/ml of streptomycin (Sigma-Aldrich). A549 expressing ACE2 and TMPRSS2 (here referred  
74 to as A549-ACE2-TMPRSS2 cells) were a kind gift from Stuart Neil (King's College, London, United  
75 Kingdom) and are described in [23]. These cells were maintained in DMEM supplemented with 8%  
76 FCS, 100 IU/ml of penicillin, 400 µg/ml of G418 (InvivoGen), and 1 µg/ml of Puromycin (Sigma-  
77 Aldrich). Huh7 cells were grown in DMEM, supplemented with 8% FCS, 2 mM L-glutamine, non-  
78 essential amino acids, 100 IU/ml of penicillin and 100 µg/ml of streptomycin.

79 The SARS-CoV-2/Leiden-0002 (Genbank: MT510999.1) and SARS-CoV-2/Leiden-0008 (Genbank:  
80 MT705206.1) isolates were obtained from nasopharyngeal samples at the LUMC at the first wave of  
81 the pandemic. For infections of A549-ACE2-TMPRSS2 cells, a SARS-CoV-2 isolate that was adapted to  
82 this cell line was used (Groenewold et al., manuscript in preparation). The SARS-CoV-2 delta variant  
83 (Leiden-KUL-Delta1) and Omicron variant (Leiden-O-71084/2021) were isolated at LUMC from a local  
84 clinical sample and material kindly provided by the National Institute for Public Health and the  
85 Environment (RIVM, Netherlands), respectively. MERS-CoV Jordan-N3 (Genbank: KJ614529.1), SARS-  
86 CoV/Frankfurt-1 (Genbank: AY291315.1) and HCoV-229E (Genbank: NC\_002645.1) were also used  
87 for this study. Infections were done using Eagle's minimal essential medium (EMEM) with 25mM  
88 HEPES (Lonza), supplemented with 2% FCS, 2 mM L-glutamine, 100 IU/ml of penicillin and 100 µg/ml  
89 of streptomycin. All experiments with SARS-CoV, SARS-CoV-2 and MERS-CoV were done in the LUMC  
90 biosafety level 3 facilities, while HCoV-229E infections were done in a biosafety level 2 laboratory.  
91 Honokiol was purchased from MedChem Express as a powder and dissolved in DMSO.

92

### 93 2. Cytopathic effect (CPE) reduction assay

94 Vero E6 cells were seeded in 96-well clusters at a density of  $5 \times 10^3$  cells/well in 100 µL. Twenty-four  
95 hours after seeding, cells were incubated with 2-fold dilutions of compound for 1 hour. After that,

96 half the cells were left uninfected, for analysis of compound's toxicity, or infected with SARS-CoV-2  
97 at a low MOI of 0.015. After three days, cell viability was measured by MTS assay using the CellTiter  
98 96® AQueous MTS Reagent (Promega). MTS absorbance was measured at 495 nm with an EnVision  
99 multiplate reader (PerkinElmer).

100

### 101 **3. Viral load reduction assay**

102 Cells were seeded at a density of  $1 \times 10^4$  (Vero E6 and Huh7) or  $2 \times 10^4$  (A549-ACE2-TMPRSS2) cells  
103 per well in 100  $\mu$ L medium in a 96-well cluster. Twenty-four hours after seeding, cells were treated  
104 with increasing concentrations of the compound and were incubated for 6 hours at 37°C.  
105 Subsequently, cells were infected for 1 hour with virus at a MOI of 1. Supernatant was harvested at  
106 16 h.p.i. for SARS-CoV, SARS-CoV-2 and MERS-CoV infections, or at 24 h.p.i. for HCoV-229E  
107 experiments. To assess viral load, extracellular viral RNA copies were quantified by RT-qPCR, and/or  
108 infectious progeny was quantified by plaque assay. The potential cytotoxicity of the compound was  
109 always tested in parallel by MTS assay in equally treated, but uninfected, cells.

110

### 111 **4. Plaque assay**

112 Vero E6 cells were seeded 1 day before infection in regular culture medium at  $1.5 \times 10^4$  cells/well in  
113 1 mL in 12-well clusters. On the day of the assay, 10-fold serial dilutions of samples were prepared in  
114 infection medium. These dilutions were used as inoculum to infect cells for 1 hour at 37°C, after  
115 which inoculum was removed and replaced with overlay medium containing 1.2% avicel, 1%  
116 antibiotics, 2% FCS and 50mM HEPES in DMEM medium. Cells were incubated at 37°C for 3 days and  
117 clusters were fixed with 7.4% formaldehyde. Wells were stained with crystal violet and plaques were  
118 manually counted to determine the sample's infectious virus titer.

119

### 120 **5. RNA isolation and quantitative real time PCR**

121 RNA was isolated from cell culture supernatants using the Bio-on-Magnetic-Beads (BOMB) method  
122 [24] using a Viaflo Assist Plus robotic system (Integra), following sample lysis in a buffer containing  
123 3M guanidine-thiocyanate, 2% N-Lauroyl-Sarcosine sodium salt, 1M Tris-HCl (pH 7.6) and 0.5M  
124 EDTA. Equine arteritis virus (EAV) RNA was spiked into the lysis reagent as an internal technical  
125 control for RNA isolation efficiency and quality. Viral RNA was amplified by RT-qPCR using the  
126 Taqman Fast Virus 1-step master mix (Thermo Fisher Scientific). Primers and probes targeting SARS-  
127 CoV-2 RNA-dependent RNA polymerase were described in [25], which were also used for SARS-CoV  
128 quantification. MERS-CoV and HCoV-229E primer sets were designed in house, targeting the gene  
129 for the nucleoprotein (N) of each virus. For absolute quantification, a standard curve generated from

130 a T7 RNA polymerase *in vitro* transcript containing the necessary RT-qPCR target fragments was  
131 used. The reaction was performed in a CFX384 Touch™ Real-Time PCR Detection System (Bio-Rad,  
132 Netherlands), with a program of 5 min at 50°C and 20 seconds at 95°C, followed by 45 cycles of 5  
133 seconds at 95°C and 30 seconds at 60°C.

134

## 135 **RESULTS**

### 136 **1. Honokiol inhibits SARS-CoV-2 replication in VeroE6 cells**

137 To evaluate if HK could protect cells from SARS-CoV-2 infection, we performed a cytopathic effect  
138 (CPE) reduction assay. Infected Vero E6 cells showed increased viability upon treatment with  
139 increasing concentrations of HK in a dose-dependent manner, with an EC50 of around 7.8 μM (Fig  
140 1A). In parallel in the same plate, uninfected cells were treated with compound to assess its toxicity.  
141 We observed no signs of cytotoxicity in Vero E6 cells for the concentrations tested.

142 To confirm that the observed protection in the CPE reduction assays was indeed caused by HK  
143 inhibition of virus replication, we conducted a viral load reduction (VLR) assay. Vero E6 cells were  
144 pretreated with increasing concentrations of HK for 6 hours. After that, cells were infected with  
145 SARS-CoV-2 at a MOI of 1 for 1 hour (in the presence of the compound), followed by incubation with  
146 medium containing compound. At 16 h.p.i., supernatant was harvested for virus quantification. RT-  
147 qPCR showed that HK caused a dose-dependent decrease in viral RNA levels. At 20 μM, a 99%  
148 reduction in viral RNA copies, from  $1.6 \times 10^9$  to  $1.3 \times 10^7$  copies/mL, was observed (Fig 1B). The  
149 infectious virus titer in the supernatant was determined by plaque assays, which showed that  
150 treatment with 20 μM of HK caused an approximate 3 log reduction in infectious virus titer (Fig 1C).  
151 Cell viability was not affected at these concentrations and only above 40 μM HK starts showing  
152 toxicity in VeroE6 cells. This suggested that HK (up to 20 μM) specifically inhibit SARS-CoV-2  
153 replication and protected cells from virus-induced CPE , without causing measurable cytotoxicity.

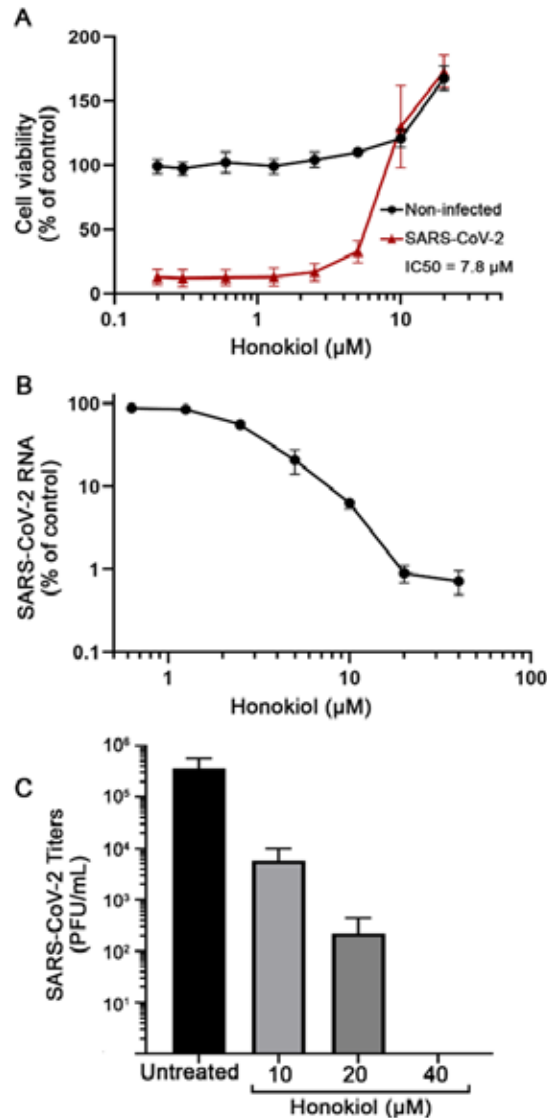

154

155 **Figure 1: Effect of Honokiol on SARS-CoV-2 mediated cytopathic effect and viral replication in Vero E6 cells.** (A) Vero E6  
156 cells were treated with increasing concentrations of HK and then infected with SARS-CoV-2 at an MOI of 0.015. After 3  
157 days, cell viability was measured by MTS assay. The viability of non-infected cells that were treated with compound was  
158 determined in parallel to assess cytotoxicity of the compound. (B, C) Vero E6 cells were treated with increasing  
159 concentrations of HK and, after 6 hours, were infected with SARS-CoV-2 at an MOI of 1. Supernatant samples were  
160 harvested at 16 h.p.i. to quantify SARS-CoV-2 RNA levels by RT-qPCR and infectious progeny titer by plaque assay.

161

162

## 163 **2. Honokiol inhibits SARS-CoV-2 replication at a post-entry step of the replication cycle**

164 To pinpoint which step of the viral replication cycle is inhibited by HK, a time-of-addition assay was  
165 performed. Treatment of Vero E6 cells with 20 μM of HK was initiated at different time points, after  
166 which it remained present until the end of the assay (unless indicated otherwise). At 0h, cells were  
167 infected with SARS-CoV-2 at an MOI of 1 and at 10 h.p.i. supernatant was harvested for

168 quantification of infectious progeny titers. Initially, we assessed the effect of different pre-  
169 treatments with 20  $\mu$ M HK and we did not observe any difference in effectiveness between  
170 treatments initiated at any time point between 8 or 1 hour prior to infection (*data not shown*). We  
171 then performed assays that involved treatments that were initiated at 1 hour before infection or at  
172 0, 1, 2, 4, 6 or 8 h.p.i. (Fig 2A). Infectious virus titers in the supernatant harvested at 10 h.p.i. were  
173 quantified by plaque assays. The maximum effect of the compound was still observed when  
174 treatment was initiated as late as 2 hours post-infection. When treatments were started later, HK  
175 gradually lost its inhibitory effect, being no longer effective after 8 h.p.i. (Fig 2B). When the  
176 compound was only present from 0 to 1 h.p.i. it had no inhibitory effect, suggesting it does not  
177 interfere with the early steps of the replication cycle. Together these results suggests that HK acts  
178 on a post-entry step of the replication cycle of SARS-CoV-2.  
179

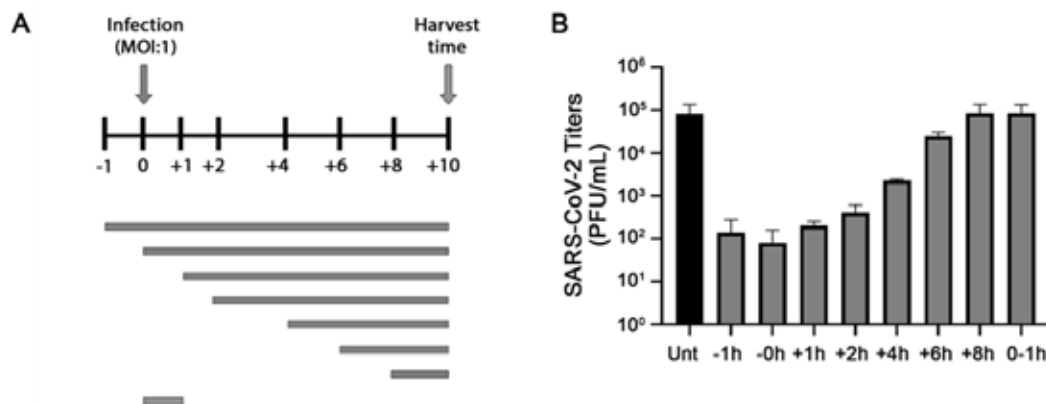

180

181

182 **Figure 2: HK inhibited SARS-CoV-2 replication at a post-entry step of the replication cycle.** (A) Schematic representation  
183 of time-of-addition assay, depicting the different treatment intervals during which infected Vero E6 cells were exposed to  
184 20  $\mu$ M of HK. (B) At 10 h.p.i., supernatants were harvested and infectious virus titers were determined by plaque assay.

185

### 186 3. Honokiol inhibits SARS-CoV-2 replication in human lung cells

187 To evaluate if HK can also inhibit SARS-CoV-2 in a more relevant cell model, A549-ACE2-TMPRSS2  
188 cells were tested. In a VLR assay, similar to the one described for Vero E6 cells, A549-ACE2-TMPRSS2  
189 cells were pretreated with HK at increasing concentrations and subsequently infected at an MOI of  
190 1. RT-qPCR analysis of supernatant samples harvested at 16 h.p.i. showed that SARS-CoV-2 was also  
191 inhibited in this model. Treatment with 10  $\mu$ M HK already led to a 95% reduction in viral RNA copies,  
192 what corresponds to a 2-log decrease in copy numbers (Fig 3A). Cell viability was measured in  
193 parallel and showed that, like in Vero E6 cells, 20  $\mu$ M can be considered a safe nontoxic  
194 concentration, whereas at 40  $\mu$ M toxicity is already detected, with a 50% decrease in cell viability  
195 (Fig 3B).

196 These results show that HK can be a good virus inhibitor even in a more relevant human cell model  
197 than the Vero E6 cell, which is a epithelial kidney cell line from African green monkeys. This, besides  
198 reinforcing the effectiveness of the compound, also suggests that its antiviral effect is not Vero E6-  
199 dependent and can be also observed in other systems.  
200

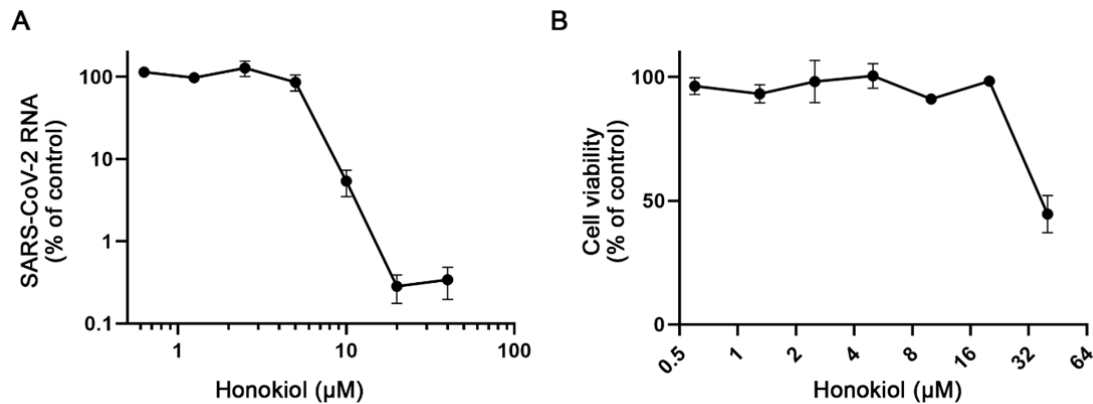

201  
202 **Figure 3: HK inhibited SARS-CoV-2 replication in A549-ACE2-TMPRSS2 cells.** (A) A549 cells expressing ACE2 and TMPRSS2  
203 were infected with SARS-CoV-2 at a MOI of 1. Treatment with HK was initiated 6 hours prior to infection and the  
204 compound remained present until medium was harvested at 16 h.p.i. to quantify extracellular viral RNA levels by RT-qPCR.  
205 (B) compound toxicity was assessed in parallel in uninfected cells treated with HK.  
206

#### 207 **4. Honokiol inhibits replication of a broad spectrum of coronaviruses.**

208 To evaluate if HK is effective against other human coronaviruses we studied its effect in Vero E6 cells  
209 infected with SARS-CoV or SARS-CoV-2 and in Huh7 cells infected with MERS-CoV or HCoV-229E.  
210 Infections were done at an MOI of 1 following a 6-hour pretreatment with HK, after which the  
211 compound remained present till the end of the experiment. The medium of MERS-CoV, SARS-CoV,  
212 and SARS-CoV-2-infected cells was harvested for virus quantification at 16 h.p.i., and that of HCoV-  
213 229E-infected cells at 24 h.p.i. RT-qPCR analysis showed that all viruses were inhibited by HK in a  
214 dose-dependent manner (Fig 5A). It is important to note that the maximum nontoxic dose of HK  
215 varied depending on the cell line used, with HK showing toxicity in HuH-7 cells already at 20 µM (Fig  
216 5B), while this concentration was not cytotoxic in Vero E6 and A549-ACE2-TMPRSS2. However, also  
217 the antiviral effect of HK was observed at lower doses in HuH-7 cells than in the other cells, as Huh-7  
218 cells infected with MERS-CoV or HCOV-229E displayed a more than a 95% reduction in viral RNA  
219 copies when cells were treated with only 10 µM of the compound. Together, these data indicates  
220 that, despite some differences in its toxicity, HK inhibited coronavirus replication in a cell line  
221 independent manner. The compound displayed a broad-spectrum antiviral effect against a range of



222 different pathologically relevant human coronaviruses, i.e. SARS-CoV-2, MERS-CoV, SARS-CoV and  
223 HCoV-229E.  
224

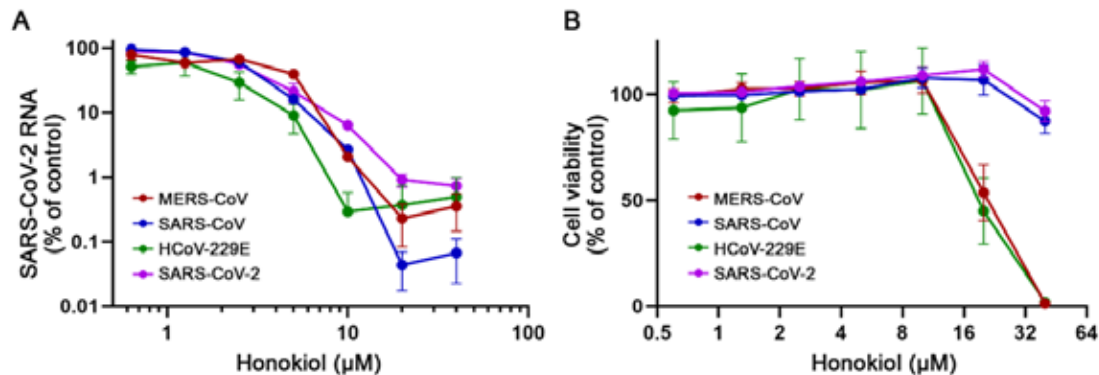

225  
226 **Figure 4: HK inhibited various human coronaviruses.** (A) Vero E6 cells were infected with SARS-CoV or SARS-CoV-2 and  
227 Huh-7 cells were infected with MERS-CoV or HCoV-229E at an MOI of 1. HK was added 6 hours before infection and  
228 remained present till the time of harvest. At 16 h.p.i. (SARS-CoV, SARS-CoV-2 and MERS) or 24 h.p.i. (HCoV-229E), the  
229 medium was harvested and the levels of viral RNA were quantified by RT-qPCR. Copy numbers were normalized to the  
230 level of untreated infected cells (100%) (B) A viability assay (MTS) was done in parallel to determine the compound's  
231 cytotoxicity.

232

### 233 5. Honokiol is effective against SARS-CoV-2 variants of concern

234 To investigate if HK was also able to inhibit replication of SARS-CoV-2 variants other than the original  
235 early pandemic strain used throughout this study, we tested its efficacy against the two major  
236 variants of concern circulating at the time of this project, namely Delta (B.1.617.2) and Omicron  
237 (B.1.1.529). Vero E6 cells were treated with HK for 6 hours and were infected with each variant at an  
238 MOI of 1. At 16 h.p.i., medium was harvested for determination of the viral load by RT-qPCR  
239 targeting the RdRP coding region (Fig 6). At 20 μM, HK inhibited all three variants, showing the  
240 strongest effect against the Delta variant, with a ~2-log reduction in copy number. The early variant  
241 was somewhat less sensitive, and the omicron variant was the least sensitive, although still a ~96%  
242 reduction was observed (from  $8.6 \times 10^7$  copies in untreated cells to  $3.3 \times 10^5$  copies in cells treated  
243 with 20 μM HK).

244

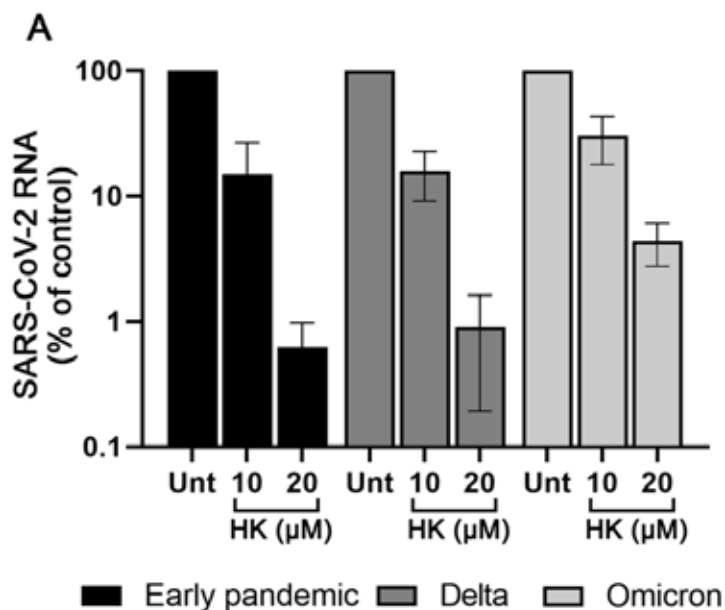

245

246 **Figure 5: HK inhibited SARS-CoV-2 variants of concern.** Vero E6 cells were treated with 10 or 20  $\mu$ M HK for 6 hours, were  
247 infected with a SARS-CoV-2 variants at an MOI of 1, followed by incubation for 16h in the presence of the compound. At 16  
248 h.p.i. supernatant was harvested and RT-qPCR targeting the RdRp gene was used to quantify the extracellular viral RNA  
249 levels.

250

251

## 252 DISCUSSION

253 Honokiol is a small lignan compound that is extracted from the barks, cones and leaves of trees of  
254 the Magnolia genus. These plants have been used in Traditional Chinese Medicine to relieve anxiety,  
255 depression and pain. In Western medicine anti-inflammatory, anti-thrombotic, anti-oxidative, anti-  
256 fungal, anti-arrhythmic and, mainly, anti-tumor properties have been attributed to HK [26]. HK is  
257 thought to inhibit tumor progression through modulation of different signaling pathways that  
258 behave aberrantly in cancer patients. For example, HK can induce autophagy in different cancer cells  
259 by down-regulating the PI3K/Akt/mTOR signaling pathway [8, 27]. HK is also able to down-regulate  
260 NF- $\kappa$ B and STAT3 [18, 20], both of which are generally involved in tumor promotion [28]. Other  
261 targets of HK include Sirt3 [19], Nrf2 [29], MAPK [30], and SMAD [31] signaling pathways. Some of  
262 these factors, such as Nrf2, Sirt3, mTOR [32-34] have been linked to pathways involved in antiviral  
263 responses. This provided the rationale for assessing the effect of HK on SARS-CoV-2 infection in cell  
264 culture. We demonstrated that in CPE reduction assays HK protected cells from the virus-mediated  
265 cytopathic effect in a dose-dependent manner (Fig 1), with an EC50 of approximately 7.8  $\mu$ M. The  
266 effect of HK was cell line-independent as it inhibited SARS-CoV-2 replication in both African green  
267 monkey Vero E6 and human A549 cells expressing ACE2 and TMPRSS2 (Fig 2 and 4). Our (single

268 cycle) time-of-addition analysis revealed that HK retains its full inhibitory effect even when  
269 treatment is initiated as late as 2 h.p.i., and then gradually loses effectiveness when treatment is  
270 initiated later. When the compound was only present during the 1 hour of infection it had no effect.  
271 This suggests that HK inhibits a post-entry step of the replication cycle. In contrast to our  
272 observations, two previous studies suggested that HK or its analogs can inhibit SARS-CoV-2 infection  
273 by targeting the binding and entry steps of the replication cycle. One study suggested that Spike-  
274 ACE2 binding was inhibited [35]. However, this study was not performed with infected cells but  
275 using artificial assays with pseudotyped viruses or biochemical assays and a less than 50% inhibition  
276 was observed at a high dose (50  $\mu$ M) of HK. Another study [36] suggested that HK inhibits furin-like  
277 proteases, but the specificity and efficacy of this inhibition (~30% at 100  $\mu$ M) remains debatable  
278 considering that a known furin inhibitor was ~700 times more potent in the same study.

279 We assessed HK's spectrum of activity and observed that it also inhibited MERS-CoV, SARS-CoV and  
280 HCoV-229E replication in cell culture, in line with the idea that HK likely exerts its antiviral effect  
281 through one or more host factors. The fact that HK also inhibited MERS-CoV and HCoV-229E, which  
282 use DPP4 and Human aminopeptidase N as receptors, respectively [37, 38], also suggests that it is  
283 unlikely that targeting of ACE2 by HK is responsible for the observed antiviral effect. Therefore, we  
284 hypothesize that HK inhibits coronavirus replication via one or more host factors involved in the  
285 (inflammatory) pathways mentioned earlier, which is currently being studied in more detail.

286 The massive scale of the SARS-CoV-2 pandemic, complications with (global) vaccine roll out, and the  
287 continuing emergence of variants (of concern) that can escape natural or vaccine-induced immunity  
288 stresses the importance of developing (multiple) antivirals to increase our preparedness. Direct  
289 acting antivirals are a good option, but their spectrum of activity and development of resistance are  
290 concerns. Therefore, also compounds that modulate pathways that are involved in the replication of  
291 (a broad range of) viruses are interesting candidates to explore as potential antivirals. In particular  
292 when this involves repurposing of existing compounds with favorable pharmacokinetics and safety  
293 profiles. Besides its antiviral effect against various coronaviruses we have also shown that HK  
294 inhibited the two major variants that were circulating at the time of our study, i.e. the delta and  
295 omicron variant (Fig 5).

296 HK appears to be well-tolerated, especially when administered orally, which would increase its  
297 acceptance as a therapeutic agent [21]. Studies in mice showed that, following intravenous  
298 administration free HK levels in the plasma reached around 200  $\mu$ g/mL [39]. That would be well  
299 above the EC50 that we found in our study (around 5  $\mu$ g/mL). Moreover, HK has good bioavailability.  
300 After a single dose orally administered in healthy rats, HK is rapidly absorbed, reaching its peak  
301 plasma concentration in 20 min and reaching various tissues after only 5 minutes. It is slowly

302 eliminated, with a half-life of approximately 290 minutes [21]. After intravenous administration, HK  
303 also shows a fast peak followed by elimination, apparently faster than when administered orally  
304 (approximately 56 minutes after a 10mg/kg dose) [22]. Some clinical studies have been conducted in  
305 humans subjected to HK or whole magnolia bark extract treatments (reviewed in [40]). In one study,  
306 three volunteers of the treatment group dropped out due to side effects, while the other 16 subjects  
307 completed the study without any signs of serious adverse events [41]. Other studies did not report  
308 adverse effects related to the treatments.

309 Effective treatment of SARS-CoV-2 infection will require both antiviral agents as well as agents that  
310 modify the host (inflammatory) response. Human aging is associated with a more severe  
311 inflammatory response to SARS-CoV-2, and Sirt3 activators such as honokiol have anti-inflammatory  
312 effects in vivo, which could have the additional benefit of reducing pathologic inflammation. In  
313 conclusion, the safety profile of HK, plasma levels that can be reached after administration and its  
314 broad-spectrum antiviral effect against multiple coronaviruses and possible effect on inflammation  
315 make it an interesting compound to explore in animal studies and clinical trials as (part of) treatment  
316 for SARS-CoV-2 infections.

317

## 318 **ACKNOWLEDGMENTS**

319 The authors would like to thank Jessika Zevenhoven, Patrick Wanningen, Mirjam Groenewold and  
320 Mariska Huizen for technical assistance and Stuart Neil (Kings college, London) for providing the  
321 A549-ACE2-TMPRSS2 cell line. Clarisse Salgado-Benvindo was supported by the Coordination for the  
322 Improvement of Higher Education Personnel (CAPES) (Process nr. 88881.171440/2018-01), Ministry  
323 of Education, Brazil.

324

## 325 **REFERENCES**

326

- 327 1. Coronaviridae Study Group of the International Committee on Taxonomy of V., *The species*  
328 *Severe acute respiratory syndrome-related coronavirus: classifying 2019-nCoV and naming it*  
329 *SARS-CoV-2*. Nat Microbiol, 2020. **5**(4): p. 536-544.
- 330 2. Huang, C., et al., *Clinical features of patients infected with 2019 novel coronavirus in Wuhan,*  
331 *China*. Lancet, 2020. **395**(10223): p. 497-506.
- 332 3. Mlcochova, P., et al., *SARS-CoV-2 B.1.617.2 Delta variant replication and immune evasion*.  
333 Nature, 2021. **599**(7883): p. 114-+.
- 334 4. Cheng, V.C., et al., *Rapid spread of SARS-CoV-2 Omicron subvariant BA.2 in a single-source*  
335 *community outbreak*. Clin Infect Dis, 2022.
- 336 5. Ong, S.W.X., et al., *Clinical and virological features of SARS-CoV-2 variants of concern: a*  
337 *retrospective cohort study comparing B.1.1.7 (Alpha), B.1.315 (Beta), and B.1.617.2 (Delta)*.  
338 Clin Infect Dis, 2021.

- 339 6. Lee, Y.J., et al., *Therapeutic applications of compounds in the Magnolia family*. Pharmacol  
340 Ther, 2011. **130**(2): p. 157-76.
- 341 7. Lee, J.S., et al., *Honokiol induces apoptosis and suppresses migration and invasion of ovarian*  
342 *carcinoma cells via AMPK/mTOR signaling pathway*. Int J Mol Med, 2019. **43**(5): p. 1969-  
343 1978.
- 344 8. Li, Z., et al., *Honokiol induces autophagy and apoptosis of osteosarcoma through*  
345 *PI3K/Akt/mTOR signaling pathway*. Mol Med Rep, 2018. **17**(2): p. 2719-2723.
- 346 9. Wang, X., et al., *Honokiol crosses BBB and BCSFB, and inhibits brain tumor growth in rat 9L*  
347 *intracerebral gliosarcoma model and human U251 xenograft glioma model*. PLoS One, 2011.  
348 **6**(4): p. e18490.
- 349 10. Rickert, U., et al., *Anti-inflammatory properties of Honokiol in activated primary microglia*  
350 *and astrocytes*. J Neuroimmunol, 2018. **323**: p. 78-86.
- 351 11. Munroe, M.E., J.L. Arbiser, and G.A. Bishop, *Honokiol, a natural plant product, inhibits*  
352 *inflammatory signals and alleviates inflammatory arthritis*. J Immunol, 2007. **179**(2): p. 753-  
353 63.
- 354 12. Hu, H., et al., *Honokiol inhibits arterial thrombosis through endothelial cell protection and*  
355 *stimulation of prostacyclin*. Acta Pharmacol Sin, 2005. **26**(9): p. 1063-8.
- 356 13. Park, C., et al., *Honokiol ameliorates oxidative stress-induced DNA damage and apoptosis of*  
357 *c2c12 myoblasts by ROS generation and mitochondrial pathway*. Anim Cells Syst (Seoul),  
358 2020. **24**(1): p. 60-68.
- 359 14. Zhang, B., et al., *Honokiol Ameliorates Myocardial Ischemia/Reperfusion Injury in Type 1*  
360 *Diabetic Rats by Reducing Oxidative Stress and Apoptosis through Activating the SIRT1-Nrf2*  
361 *Signaling Pathway*. Oxid Med Cell Longev, 2018. **2018**: p. 3159801.
- 362 15. Fang, C.Y., et al., *Honokiol, a Lignan Biphenol Derived from the Magnolia Tree, Inhibits*  
363 *Dengue Virus Type 2 Infection*. Viruses, 2015. **7**(9): p. 4894-910.
- 364 16. Lan, K.H., et al., *Multiple effects of Honokiol on the life cycle of hepatitis C virus*. Liver Int,  
365 2012. **32**(6): p. 989-97.
- 366 17. Liu, S., et al., *Inhibition of Herpes Simplex Virus-1 Replication by Natural Compound Honokiol*.  
367 Virol Sin, 2019. **34**(3): p. 315-323.
- 368 18. Rajendran, P., et al., *Honokiol inhibits signal transducer and activator of transcription-3*  
369 *signaling, proliferation, and survival of hepatocellular carcinoma cells via the protein tyrosine*  
370 *phosphatase SHP-1*. J Cell Physiol, 2012. **227**(5): p. 2184-95.
- 371 19. Pillai, V.B., et al., *Honokiol blocks and reverses cardiac hypertrophy in mice by activating*  
372 *mitochondrial Sirt3*. Nat Commun, 2015. **6**: p. 6656.
- 373 20. Tse, A.K., et al., *Honokiol inhibits TNF-alpha-stimulated NF-kappaB activation and NF-*  
374 *kappaB-regulated gene expression through suppression of IKK activation*. Biochem  
375 Pharmacol, 2005. **70**(10): p. 1443-57.
- 376 21. Jun-Jun, W., et al., *The Pharmacokinetics and Tissue Distribution of Honokiol and its*  
377 *Metabolites in Rats*. Eur J Drug Metab Pharmacokinet, 2016. **41**(5): p. 587-94.
- 378 22. Tsai, T.H.C., C.J., Cheng, F.C.; Chen, C.F, *Pharmacokinetics of honokiol after intravenous*  
379 *administration in rats assessed using high performance liquid chromatography*. Journal of  
380 Chromatography B: Biomedical Sciences and Applications, 1994. **655**(1): p. 41-45.
- 381 23. Winstone, H., et al., *The Polybasic Cleavage Site in SARS-CoV-2 Spike Modulates Viral*  
382 *Sensitivity to Type I Interferon and IFITM2*. J Virol, 2021. **95**(9).
- 383 24. Oberacker, P., et al., *Bio-On-Magnetic-Beads (BOMB): Open platform for high-throughput*  
384 *nucleic acid extraction and manipulation*. PLoS Biol, 2019. **17**(1): p. e3000107.
- 385 25. Salgado-Benvindo, C., et al., *Suramin Inhibits SARS-CoV-2 Infection in Cell Culture by*  
386 *Interfering with Early Steps of the Replication Cycle*. Antimicrob Agents Chemother, 2020.  
387 **64**(8).
- 388 26. Arora, S., et al., *Honokiol: a novel natural agent for cancer prevention and therapy*. Curr Mol  
389 Med, 2012. **12**(10): p. 1244-52.

- 390 27. Yeh, P.S., et al., *Honokiol induces autophagy of neuroblastoma cells through activating the*  
391 *PI3K/Akt/mTOR and endoplasmic reticular stress/ERK1/2 signaling pathways and*  
392 *suppressing cell migration*. *Cancer Lett*, 2016. **370**(1): p. 66-77.
- 393 28. Bollrath, J. and F.R. Greten, *IKK/NF-kappaB and STAT3 pathways: central signalling hubs in*  
394 *inflammation-mediated tumour promotion and metastasis*. *EMBO Rep*, 2009. **10**(12): p.  
395 1314-9.
- 396 29. Hou, Y., et al., *Honokiol Alleviates Oxidative Stress-Induced Neurotoxicity via Activation of*  
397 *Nrf2*. *ACS Chem Neurosci*, 2018. **9**(12): p. 3108-3116.
- 398 30. Li, S., et al., *Liposomal Honokiol induces ROS-mediated apoptosis via regulation of ERK/p38-*  
399 *MAPK signaling and autophagic inhibition in human medulloblastoma*. *Signal Transduct*  
400 *Target Ther*, 2022. **7**(1): p. 49.
- 401 31. Qin, T., et al., *Honokiol Suppresses Perineural Invasion of Pancreatic Cancer by Inhibiting*  
402 *SMAD2/3 Signaling*. *Front Oncol*, 2021. **11**: p. 728583.
- 403 32. Appelberg, S., et al., *Dysregulation in Akt/mTOR/HIF-1 signaling identified by proteo-*  
404 *transcriptomics of SARS-CoV-2 infected cells*. *Emerg Microbes Infect*, 2020. **9**(1): p. 1748-  
405 1760.
- 406 33. Zhang, L., et al., *Upregulation of nuclear factor E2-related factor 2 (Nrf2) represses the*  
407 *replication of herpes simplex virus type 1*. *Virology*, 2022. **19**(1): p. 23.
- 408 34. Sheng, X. and I.M. Cristea, *The antiviral sirtuin 3 bridges protein acetylation to mitochondrial*  
409 *integrity and metabolism during human cytomegalovirus infection*. *PLoS Pathog*, 2021. **17**(4):  
410 p. e1009506.
- 411 35. Guo, Y., et al., *Synthesis and Biological Evaluation of Honokiol Derivatives Bearing 3-((5-*  
412 *phenyl-1,3,4-oxadiazol-2-yl)methyl)oxazol-2(3H)-ones as Potential Viral Entry Inhibitors*  
413 *against SARS-CoV-2*. *Pharmaceuticals (Basel)*, 2021. **14**(9).
- 414 36. Tanikawa, T., et al., *Inhibitory effect of honokiol on furin-like activity and SARS-CoV-2*  
415 *infection*. *J Tradit Complement Med*, 2022. **12**(1): p. 69-72.
- 416 37. Raj, V.S., et al., *Dipeptidyl peptidase 4 is a functional receptor for the emerging human*  
417 *coronavirus-EMC*. *Nature*, 2013. **495**(7440): p. 251-254.
- 418 38. Yeager, C.L., et al., *Human aminopeptidase N is a receptor for human coronavirus 229E*.  
419 *Nature*, 1992. **357**(6377): p. 420-2.
- 420 39. Jiang, Q.Q., et al., *Improved therapeutic effectiveness by combining liposomal honokiol with*  
421 *cisplatin in lung cancer model*. *BMC Cancer*, 2008. **8**: p. 242.
- 422 40. Sarrica, A., et al., *Safety and Toxicology of Magnolol and Honokiol*. *Planta Med*, 2018. **84**(16):  
423 p. 1151-1164.
- 424 41. Kalman, D.S., et al., *Effect of a proprietary Magnolia and Phellodendron extract on stress*  
425 *levels in healthy women: a pilot, double-blind, placebo-controlled clinical trial*. *Nutr J*, 2008.  
426 **7**: p. 11.
